# Supplementary material
Source: PubMed Central journal article supplement (PMC5846163)
Supplement: supp_RA118.001784_135120_1_supp_61935_p32x7w.pdf [file supp_RA118.001784_135120_1_supp_61935_p32x7w.pdf]

**An N-terminal motif unique to primate tau enables differential protein–protein interactions**

Kristie Stefanoska, Alexander Volkerling, Josefine Bertz, Anne Poljak, Yazı Diana Ke, Lars Matthias Ittner, Arne Ittner

**Supporting Information****Supporting tables**

**Table S1.** Protein summary results for ProteinPilot v4.0 analysis. Numbers for proteins detected refer to all proteins identified at global 1% FDR or 95% confidence. Hence, this includes contaminating proteins (e.g. trypsin), proteins with no quantitation data or only one distinct peptide for identification.

| iTRAQ            | Proteins detected <sup>a</sup> | Proteins detected <sup>b</sup> | Proteins before grouping <sup>b</sup> | Distinct peptides <sup>b</sup> | Spectra identified <sup>b</sup> | %total spectra |
|------------------|--------------------------------|--------------------------------|---------------------------------------|--------------------------------|---------------------------------|----------------|
| tauFL/Δ18 8-plex | 101                            | 133                            | 947                                   | 1239                           | 3930                            | 24.7           |

<sup>a</sup>1% global FDR<sup>b</sup>95% confidence, equal to ProteinPilot unused score <= 1.3

| Unused score | %Cov(95) | Accession     | Name                                                                                      | Peptides (95%) |
|--------------|----------|---------------|-------------------------------------------------------------------------------------------|----------------|
|              | 76.9     | gi 150207Add2 | gi 150207Add2 xxx xxx  AddedProtein2: httau40 <sup>c</sup>                                | 158            |
|              |          |               | PREDICTED: pyruvate kinase PKM isoform X2 [Mus musculus]                                  |                |
| 33.34        | 38.6     | gi 755529785  | musculus]                                                                                 | 25             |
| 30.49        | 48.03    | gi 10946574   | creatine kinase B-type [Mus musculus]                                                     | 21             |
| 29.23        | 54.9     | gi 6754086    | glutathione S-transferase Mu 5 [Mus musculus]                                             | 23             |
|              |          |               | dihydropyrimidinase-related protein 2 [Mus musculus]                                      |                |
| 28.59        | 38.1     | gi 40254595   | musculus]                                                                                 | 26             |
| 24.33        | 33.3     | gi 31981690   | heat shock cognate 71 kDa protein [Mus musculus]                                          | 24             |
|              |          |               | PREDICTED: glyceraldehyde-3-phosphate dehydrogenase isoform X3 [Mus musculus]             |                |
| 23.84        | 39.8     | gi 755516109  | musculus]                                                                                 | 18             |
|              |          |               | PREDICTED: alpha-enolase isoform X1 [Mus musculus]                                        |                |
| 23.30        | 43.8     | gi 755567900  | musculus]                                                                                 | 14             |
|              |          |               | PREDICTED: clathrin heavy chain 1 isoform X3 [Mus musculus]                               |                |
| 23.27        | 10.8     | gi 568975337  | musculus]                                                                                 | 14             |
|              |          |               | PREDICTED: sodium/potassium-transporting ATPase subunit alpha-3 isoform X3 [Mus musculus] |                |
| 22.55        | 13.2     | gi 755519440  | musculus]                                                                                 | 12             |
| 20.89        | 54.5     | gi 6755901    | tubulin alpha-1A chain [Mus musculus]                                                     | 28             |
|              |          |               | fructose-bisphosphate aldolase A isoform 2 [Mus musculus]                                 |                |
| 20.04        | 35.4     | gi 6671539    | musculus]                                                                                 | 14             |
| 19.67        | 23.6     | gi 110625979  | elongation factor 1-gamma [Mus musculus]                                                  | 11             |
| 18.71        | 28.4     | gi 254540027  | malate dehydrogenase, cytoplasmic [Mus musculus]                                          | 9              |
| 17.95        | 17.3     | gi 40556608   | heat shock protein HSP 90-beta [Mus musculus]                                             | 12             |
| 16.56        | 32.4     | gi 6681273    | elongation factor 1-alpha 2 [Mus musculus]                                                | 13             |
| 16.56        | 32.4     | gi 6681273    | elongation factor 1-alpha 2 [Mus musculus]                                                | 13             |
| 16.05        | 49.5     | gi 6754084    | glutathione S-transferase Mu 1 [Mus musculus]                                             | 24             |
|              |          |               | PREDICTED: 14-3-3 protein zeta/delta isoform X1 [Mus musculus]                            |                |
| 14.97        | 40.0     | gi 755550334  | musculus]                                                                                 | 12             |
|              |          |               | L-lactate dehydrogenase B chain isoform 1 [Mus musculus]                                  |                |
| 14.86        | 23.4     | gi 6678674    | musculus]                                                                                 | 8              |
| 14.40        | 40.3     | gi 6752954    | actin, cytoplasmic 2 [Mus musculus]                                                       | 16             |
| 14.39        | 36.1     | gi 226958349  | triosephosphate isomerase [Mus musculus]                                                  | 9              |
| 14.21        | 26.3     | gi 31982332   | glutamine synthetase [Mus musculus]                                                       | 12             |

|       |      |              |                                                      |    |
|-------|------|--------------|------------------------------------------------------|----|
| 13.48 | 28.5 | gi 113680352 | carbonyl reductase [NADPH] 1 [Mus musculus]          | 9  |
|       |      |              | 2',3'-cyclic-nucleotide 3'-phosphodiesterase isoform |    |
| 13.32 | 23.0 | gi 226423909 | 1 [Mus musculus]                                     | 9  |
| 13.15 | 34.3 | gi 114326546 | phosphoglycerate mutase 1 [Mus musculus]             | 7  |
| 12.39 | 49.5 | gi 10092608  | glutathione S-transferase P 1 [Mus musculus]         | 33 |
| 12.04 | 51.7 | gi 6753244   | calmodulin [Mus musculus]                            | 11 |
| 11.87 | 26.7 | gi 742670581 | fructose-bisphosphate aldolase C [Mus musculus]      | 9  |
| 11.15 | 29.3 | gi 6679439   | peptidyl-prolyl cis-trans isomerase A [Mus musculus] | 6  |
| 10.73 | 41.6 | gi 45597447  | superoxide dismutase [Cu-Zn] [Mus musculus]          | 7  |
| 10.67 | 21.3 | gi 70778976  | phosphoglycerate kinase 1 [Mus musculus]             | 9  |
|       |      |              | PREDICTED: carbonic anhydrase 2 isoform X1 [Mus      |    |
| 10.00 | 27.7 | gi 568920559 | musculus]                                            | 6  |
|       |      |              | malate dehydrogenase, mitochondrial precursor        |    |
| 9.84  | 24.9 | gi 31982186  | [Mus musculus]                                       | 8  |
|       |      |              | PREDICTED: lanC-like protein 1 isoform X1 [Mus       |    |
| 8.26  | 15.5 | gi 569018370 | musculus]                                            | 6  |
| 8.00  | 46.9 | gi 6678467   | tubulin alpha-4A chain [Mus musculus]                | 25 |
|       |      |              | PREDICTED: beta-synuclein isoform X1 [Mus            |    |
| 8.00  | 49.6 | gi 568982871 | musculus]                                            | 5  |
| 7.92  | 39.9 | gi 113679874 | glutathione S-transferase Mu 7 [Mus musculus]        | 17 |
| 7.89  | 8.4  | gi 254553458 | glucose-6-phosphate isomerase [Mus musculus]         | 4  |
| 7.89  | 29.0 | gi 742068536 | peroxiredoxin-6 isoform 2 [Mus musculus]             | 7  |
|       |      |              | aconitate hydratase, mitochondrial precursor [Mus    |    |
| 7.85  | 10.3 | gi 18079339  | musculus]                                            | 6  |
| 7.49  | 7.6  | gi 160707903 | synapsin-1 isoform b [Mus musculus]                  | 4  |
|       |      |              | ubiquitin carboxyl-terminal hydrolase isozyme L1     |    |
| 7.00  | 34.5 | gi 188219614 | [Mus musculus]                                       | 5  |
| 6.61  | 28.3 | gi 6680924   | cofilin-1 [Mus musculus]                             | 4  |
| 6.59  | 29.2 | gi 160298217 | glutathione S-transferase A4 [Mus musculus]          | 9  |
| 6.54  | 27.6 | gi 31980922  | elongation factor 1-beta [Mus musculus]              | 5  |
| 6.51  | 6.6  | gi 39204499  | neurofilament light polypeptide [Mus musculus]       | 4  |
|       |      |              | glutamate dehydrogenase 1, mitochondrial             |    |
| 6.48  | 9.8  | gi 6680027   | precursor [Mus musculus]                             | 4  |
| 6.39  | 14.5 | gi 6679935   | neuromodulin [Mus musculus]                          | 3  |
|       |      |              | PREDICTED: putative adenosylhomocysteinase 2         |    |
| 6.37  | 6.4  | gi 568922642 | isoform X1 [Mus musculus]                            | 3  |
| 6.26  | 31.3 | gi 69885073  | myelin basic protein isoform 6 [Mus musculus]        | 4  |
|       |      |              | 4-aminobutyrate aminotransferase, mitochondrial      |    |
| 6.20  | 12.4 | gi 37202121  | isoform 1 precursor [Mus musculus]                   | 4  |
| 5.97  | 25.1 | gi 703491589 | gamma-enolase isoform 2 [Mus musculus]               | 6  |
|       |      |              | aspartate aminotransferase, cytoplasmic [Mus         |    |
| 5.89  | 7.7  | gi 160298209 | musculus]                                            | 4  |
|       |      |              | PREDICTED: CDK5 regulatory subunit-associated        |    |
| 5.65  | 32.6 | gi 755506225 | protein 2 isoform X10 [Mus musculus]                 | 11 |
| 5.57  | 6.1  | gi 165972307 | syntaxin-binding protein 1 isoform a [Mus musculus]  | 3  |
| 5.54  | 206  | gi 6754976   | peroxiredoxin-1 [Mus musculus]                       | 5  |
|       |      |              | aspartate aminotransferase, mitochondrial [Mus       |    |
| 4.61  | 7.0  | gi 6754036   | musculus]                                            | 3  |
| 4.51  | 2.8  | gi 568912897 | PREDICTED: dynamin-1 isoform X10 [Mus musculus]      | 3  |
|       |      |              | PREDICTED: microtubule-associated protein 1A         |    |
| 4.47  | 0.8  | gi 568915692 | isoform X1 [Mus musculus]                            | 2  |
| 4.31  | 22.3 | gi 226874906 | 14-3-3 protein epsilon [Mus musculus]                | 6  |
| 4.25  | 19.1 | gi 6679078   | nucleoside diphosphate kinase B [Mus musculus]       | 3  |
| 4.15  | 34.4 | gi 31543976  | 14-3-3 protein gamma [Mus musculus]                  | 8  |
| 4.03  | 22.8 | gi 62460366  | parathymosin [Mus musculus]                          | 2  |

|      |      |                   |                                                                                                        |    |
|------|------|-------------------|--------------------------------------------------------------------------------------------------------|----|
| 4.00 | 16.4 | gi 227330544      | complexin-1 [Mus musculus]                                                                             | 2  |
| 3.89 | 16.7 | gi 568956465      | PREDICTED: peroxiredoxin-2 isoform X1 [Mus musculus]                                                   | 3  |
| 3.84 | 14.5 | gi 6754254        | heat shock protein HSP 90-alpha [Mus musculus]                                                         | 10 |
| 3.83 | 17.8 | gi 6755983        | visinin-like protein 1 [Mus musculus]                                                                  | 3  |
| 3.46 | 48.4 | gi 31981939       | tubulin beta-4A chain [Mus musculus]                                                                   | 31 |
| 3.42 | 40.9 | gi 569011811      | PREDICTED: thymosin beta-4 isoform X1 [Mus musculus]                                                   | 2  |
| 3.12 | 40.9 | gi 569011811      | PREDICTED: thymosin beta-4 isoform X1 [Mus musculus]                                                   | 2  |
| 3.12 | 6.4  | gi 26006861       | pyridoxal kinase [Mus musculus]                                                                        | 2  |
| 3.03 | 3.7  | gi 568983700      | PREDICTED: tubulin polymerization-promoting protein isoform X1 [Mus musculus]                          | 1  |
| 2.67 | 13.3 | gi 83921595       | acyl-CoA-binding protein isoform 1 [Mus musculus]                                                      | 1  |
| 2.60 | 1.9  | gi 755553090      | PREDICTED: V-type proton ATPase catalytic subunit A isoform X1 [Mus musculus]                          | 1  |
| 2.58 | 9.9  | gi 755550928      | PREDICTED: ADP-ribosylation factor 3 isoform X1 [Mus musculus]                                         | 2  |
| 2.44 | 1.2  | gi 568991693      | PREDICTED: ATP-dependent 6-phosphofructokinase, muscle type isoform X1 [Mus musculus]                  | 1  |
| 2.31 | 2.9  | gi 6680045        | guanine nucleotide-binding protein G(I)/G(S)/G(T) subunit beta-1 [Mus musculus]                        | 1  |
| 2.21 | 8.6  | gi 6755114        | peroxiredoxin-5, mitochondrial precursor [Mus musculus]                                                | 1  |
| 2.17 | 22.1 | gi 126032329      | elongation factor 1-alpha 1 [Mus musculus]                                                             | 9  |
| 2.17 | 22.1 | gi 126032329      | elongation factor 1-alpha 1 [Mus musculus]                                                             | 9  |
| 2.15 | 4.1  | gi 13385942       | citrate synthase, mitochondrial precursor [Mus musculus]                                               | 2  |
| 2.15 | 4.1  | gi 13385942       | citrate synthase, mitochondrial precursor [Mus musculus]                                               | 2  |
| 2.13 | 2.1  | gi 124286811      | neurofilament heavy polypeptide [Mus musculus]                                                         | 3  |
| 2.08 | 3.4  | gi 6753060        | annexin A5 [Mus musculus]                                                                              | 1  |
| 2.06 | 5.6  | gi 568904952      | PREDICTED: ES1 protein homolog, mitochondrial [Mus musculus]                                           | 1  |
| 2.02 | 0.4  | RRRRRgi 568945980 | REVERSED PREDICTED: cation channel sperm-associated protein subunit gamma 1 isoform X12 [Mus musculus] | 1  |
| 2.02 | 2.2  | gi 9845253        | heterogeneous nuclear ribonucleoprotein H2 [Mus musculus]                                              | 1  |
| 2.02 | 6.8  | gi 6755588        | synaptosomal-associated protein 25 isoform a [Mus musculus]                                            | 1  |
| 2.01 | 8.1  | gi 16716569       | protease, serine, 1 precursor [Mus musculus]                                                           | 6  |
| 2.01 | 1.6  | gi 755508249      | PREDICTED: neurochondrin isoform X1 [Mus musculus]                                                     | 1  |
| 2.00 | 1.1  | RRRRRgi 51491856  | REVERSED sodium-coupled monocarboxylate transporter 2 isoform 1 [Mus musculus]                         | 1  |
| 2.00 | 43.2 | gi 7106439        | tubulin beta-5 chain [Mus musculus]                                                                    | 27 |
| 2.00 | 27.6 | gi 568917832      | PREDICTED: 14-3-3 protein beta/alpha isoform X1 [Mus musculus]                                         | 10 |
| 2.00 | 24.4 | gi 6756037        | 14-3-3 protein eta [Mus musculus]                                                                      | 6  |
| 2.00 | 26.9 | gi 11528516       | neurogranin [Mus musculus]                                                                             | 2  |
| 2.00 | 2.2  | gi 112363107      | neurofilament medium polypeptide [Mus musculus]                                                        | 2  |
| 2.00 | 4.2  | gi 6753242        | calbindin [Mus musculus]                                                                               | 1  |

|      |      |              |                                                                                                        |   |
|------|------|--------------|--------------------------------------------------------------------------------------------------------|---|
| 2.00 | 5.2  | gi 755556595 | PREDICTED: protein kinase C and casein kinase substrate in neurons protein 1 isoform X1 [Mus musculus] | 1 |
| 2.00 | 0.3  | gi 568940864 | PREDICTED: inositol 1,4,5-trisphosphate receptor type 1 isoform X15 [Mus musculus]                     | 1 |
| 2.00 | 1.1  | gi 189409138 | cullin-associated NEDD8-dissociated protein 1 [Mus musculus]                                           | 2 |
| 2.00 | 2.0  | gi 113680348 | fascin [Mus musculus]                                                                                  | 1 |
| 2.00 | 1.2  | gi 225735584 | hexokinase-1 isoform HK1 [Mus musculus]                                                                | 1 |
| 2.00 | 4.2  | gi 148539957 | alpha-internexin [Mus musculus]                                                                        | 2 |
| 2.00 | 6.6  | gi 755476257 | PREDICTED: LOW QUALITY PROTEIN: dihydropteridine reductase-like [Mus musculus]                         | 1 |
| 2.00 | 1.1  | gi 568978506 | PREDICTED: reticulon-1 isoform X1 [Mus musculus]                                                       | 1 |
| 2.00 | 6.0  | gi 7710086   | ras-related protein Rab-10 [Mus musculus]                                                              | 1 |
| 2.00 | 2.2  | gi 755517291 | PREDICTED: secernin-1 isoform X1 [Mus musculus]                                                        | 1 |
| 2.00 | 4.2  | gi 755509924 | PREDICTED: protein DJ-1 isoform X1 [Mus musculus]                                                      | 1 |
| 2.00 | 7.9  | gi 47564127  | dynein light chain LC8-type 1-like [Mus musculus]                                                      | 1 |
| 2.00 | 1.6  | gi 157951598 | calpain-2 catalytic subunit [Mus musculus]                                                             | 1 |
| 2.00 | 7.1  | gi 9506971   | profilin-2 [Mus musculus]                                                                              | 1 |
| 2.00 | 7.1  | gi 84794597  | calcineurin subunit B type 1 [Mus musculus]                                                            | 1 |
| 2.00 | 4.7  | gi 7304963   | chloride intracellular channel protein 4 [Mus musculus]                                                | 1 |
| 2.00 | 12.6 | gi 7110705   | prothymosin alpha [Mus musculus]                                                                       | 1 |
| 2.00 | 12.4 | gi 6755911   | thioredoxin [Mus musculus]                                                                             | 1 |
| 2.00 | 4.5  | gi 6679108   | nucleophosmin isoform 1 [Mus musculus]                                                                 | 1 |
| 2.00 | 2.9  | gi 6678197   | synaptotagmin-1 isoform 1 [Mus musculus]                                                               | 1 |
| 2.00 | 4.5  | gi 594542556 | myelin proteolipid protein isoform 3 [Mus musculus]                                                    | 1 |
| 2.00 | 7.8  | gi 568972328 | PREDICTED: rho GDP-dissociation inhibitor 1 isoform X1 [Mus musculus]                                  | 1 |
| 2.00 | 1.0  | gi 160333923 | heterogeneous nuclear ribonucleoprotein U [Mus musculus]                                               | 1 |
| 1.77 | 2.2  | gi 54607171  | keratin, type II cytoskeletal 6A [Mus musculus]                                                        | 1 |
| 1.77 | 2.1  | gi 8567410   | synapsin-2 isoform IIb [Mus musculus]                                                                  | 1 |
| 1.77 | 0.8  | gi 755567432 | PREDICTED: microtubule-associated protein 2 isoform X9 [Mus musculus]                                  | 1 |
| 1.77 | 22.2 | gi 755524407 | PREDICTED: Purkinje cell protein 2 isoform X1 [Mus musculus]                                           | 1 |
| 1.72 | 8.1  | gi 6754524   | L-lactate dehydrogenase A chain isoform 1 [Mus musculus]                                               | 2 |
| 1.70 | 6.6  | gi 19527388  | ubiquitin thioesterase OTUB1 [Mus musculus]                                                            | 1 |
| 1.66 | 5.2  | gi 7949055   | hippocalcin-like protein 1 [Mus musculus]                                                              | 1 |
| 1.64 | 5.0  | gi 568946688 | PREDICTED: 40S ribosomal protein S9 isoform X1 [Mus musculus]                                          | 1 |
| 1.62 | 1.3  | gi 9790049   | nitric oxide-associated protein 1 [Mus musculus]                                                       | 3 |
| 1.48 | 16.1 | gi 7305287   | metallothionein-3 [Mus musculus]                                                                       | 2 |
| 1.46 | 4.1  | gi 568912818 | PREDICTED: adenylate kinase isoenzyme 1 isoform X1 [Mus musculus]                                      | 1 |
| 1.43 | 1.5  | gi 568913591 | PREDICTED: gelsolin isoform X1 [Mus musculus]                                                          | 2 |
| 1.30 | 2.3  | gi 85362742  | calcium/calmodulin-dependent protein kinase type II subunit gamma isoform 2 [Mus musculus]             | 1 |

<sup>c</sup>human tau was added to the ProteinPilot search to facilitate identification of tau bait protein

**Table S2.** Protein functional annotation clustering with DAVID v6.8. Proteins identified in iTRAQ interaction screen and confirmed differential binding partners from gel excision/mass spectrometry approach were used for gene ontology analysis using DAVID Bioinformatics Resources 6.8. Only enrichment categories that were statistically significant after correction for multiple testing (Bonferroni-adjusted p-value <0.05) are listed.

| Category               | Term                            | Count | %    | p-value  | List Total | Pop Hits | Pop Total | Fold Enrichment | Bonferroni | Benjamini | FDR    |
|------------------------|---------------------------------|-------|------|----------|------------|----------|-----------|-----------------|------------|-----------|--------|
| Enrichment Score: 3.62 |                                 |       |      |          |            |          |           |                 |            |           |        |
| GOTERM_CC<br>DIRECT    | GO:0030424~axon                 | 5     | 62.5 | 4.13E-06 | 8          | 370      | 19662     | 33              | 2.73E-04   | 2.74E-04  | 0.0042 |
| GOTERM_CC<br>DIRECT    | GO:0014069~postsynaptic density | 4     | 50   | 5.99E-05 | 8          | 239      | 19662     | 41              | 0.0039     | 0.0020    | 0.0612 |
| UP_KEYWO<br>RDS        | Synapse                         | 4     | 50   | 1.29E-04 | 8          | 357      | 22680     | 32              | 0.0053     | 0.0053    | 0.1188 |
| GOTERM_CC<br>DIRECT    | GO:0045202~synapse              | 4     | 50   | 5.46E-04 | 8          | 505      | 19662     | 19              | 0.0354     | 0.0090    | 0.5566 |
| UP_KEYWO<br>RDS        | Cell junction                   | 4     | 50   | 7.90E-04 | 8          | 661      | 22680     | 17              | 0.0319     | 0.0107    | 0.7248 |
| Enrichment Score: 2.78 |                                 |       |      |          |            |          |           |                 |            |           |        |
| GOTERM_CC<br>DIRECT    | GO:0030424~axon                 | 5     | 62.5 | 4.13E-06 | 8          | 370      | 19662     | 33              | 2.73E-04   | 2.74E-04  | 0.0042 |
| GOTERM_CC<br>DIRECT    | GO:0014069~postsynaptic density | 4     | 50   | 5.99E-05 | 8          | 239      | 19662     | 41              | 0.0039     | 0.0020    | 0.0612 |
| GOTERM_CC<br>DIRECT    | GO:0030425~dendrite             | 4     | 44   | 5.00E-04 | 8          | 490      | 19662     | 20              | 0.0324     | 0.0109    | 0.5097 |

**Table S3.** Protein network summary for STRING v10.5 analysis. Medium confidence with a minimum interaction score of 0.400.

| <b>Network stats</b>                  |                                        |                                   |                      |
|---------------------------------------|----------------------------------------|-----------------------------------|----------------------|
| Number of nodes                       | 8                                      | Avg. local clustering coefficient | 0.542                |
| Number of edges                       | 7                                      | Expected number of edges          | 0                    |
| Average node degree                   | 1.75                                   | PPI enrichment p-value            | $7.1 \times 10^{-7}$ |
| <b>Functional enrichment</b>          |                                        |                                   |                      |
| Molecular Function (GO)               |                                        |                                   |                      |
| pathway ID                            | pathway description                    | count                             | false discovery rate |
| GO:0005543                            | phospholipid binding                   | 4                                 | 0.0071               |
| GO:1901981                            | phosphatidylinositol phosphate binding | 3                                 | 0.0090               |
| GO:0043168                            | anion binding                          | 6                                 | 0.0229               |
| GO:0005515                            | protein binding                        | 7                                 | 0.0468               |
| Cellular Component (GO)               |                                        |                                   |                      |
| pathway ID                            | pathway description                    | count                             | false discovery rate |
| GO:0030054                            | cell junction                          | 6                                 | 0.0004               |
| GO:0016023                            | cytoplasmic membrane-bound vesicle     | 5                                 | 0.0012               |
| GO:0030424                            | axon                                   | 4                                 | 0.0012               |
| GO:0030659                            | cytoplasmic vesicle membrane           | 4                                 | 0.0012               |
| GO:0044456                            | synapse part                           | 4                                 | 0.0027               |
| GO:0014069                            | postsynaptic density                   | 3                                 | 0.0046               |
| GO:0045202                            | synapse                                | 4                                 | 0.0051               |
| PFAM Protein Domains                  |                                        |                                   |                      |
| pathway ID                            | pathway description                    | count                             | false discovery rate |
| PF00244                               | 14-3-3 protein                         | 2                                 | 0.0030               |
| INTERPRO Protein Domains and Features |                                        |                                   |                      |
| pathway ID                            | pathway description                    | count                             | false discovery rate |
| IPR000308                             | 14-3-3 protein                         | 2                                 | 0.0033               |
| IPR023409                             | 14-3-3 protein, conserved site         | 2                                 | 0.0033               |
| IPR023410                             | 14-3-3 domain                          | 2                                 | 0.0033               |

**Table S4.** Oligonucleotide primers used for genotyping of *Mapt*<sup>-/-</sup> mice.

| Strain                   | Forward primer (5'-3') | Reverse primer (5'-3') |
|--------------------------|------------------------|------------------------|
| <i>tau</i> <sup>WT</sup> | CTCAGCATCCCACCTGTAAC   | CCAGTTGTGTATGTCCACCC   |
| <i>tau</i> <sup>KO</sup> | AAGTTCATCTGCACCACCG    | TGCTCAGGTAGTGGTTGTCTG  |

**Table S5.** Oligonucleotide primers used for generation of plasmid constructs.

| Strain                 | Forward primer (5'-3')                   | Reverse primer (5'-3')                                           |
|------------------------|------------------------------------------|------------------------------------------------------------------|
| <i>tau</i> $\Delta$ 18 | GGGGGCTACACCATGCAC                       | AGCGTGATCTTCCATCACTTCG                                           |
| <i>tau</i> FL          | AAGTTCATCTGCACCACCG                      | TGCTCAGGTAGTGGTTGTCTG                                            |
| Anxa5                  | GATAGAATTCATGGCTACGAG<br>AGGCACTGTGAC    | GTAAGTCGAGTCAGTCATCCTCGCCCCCGCA<br>G                             |
| Anxa5-HA               | GATAGAATTCACCATGGCTAC<br>GAGAGGCACTGTGAC | GTAAGTCGAGTCAGGCGTAATCTGGAACATC<br>GTATGGGTA GTCATCCTCGCCCCCGCAG |
| GST-tau                | GACGAATTCGCTGAGCCCCGC<br>CAGGAG          | GACCTCGAGTCACAAACCCTGCTTGGCCA                                    |
